# Supplementary material
Source: publisher site journal article supplement (https://www.spandidos-publications.com/8550/downloadSupplementary)
Supplement: Supplementary file 1 [file downloadSupplementary]

Table SI. Sequences of primers used for quantitative PCR.

| Oligomer      | Forward primer, 5'→3'    | Reverse primer, 5'→3'    |
|---------------|--------------------------|--------------------------|
| GAPDH         | GCATCCACTGGTGCTGCC       | TCATCATACTTGGCAGGTTTC    |
| SREBP2        | AGAAAGAGCGGTGGAGTCCTTG   | GAACTGCTGGAGAATGGTGAGG   |
| LSS           | GCACACCACAGACCTGAGTTTC   | CAGTGTGCTGAAGGAGAAACCAC  |
| HMGCR         | GGTGCAAAGTTCCTTAGTGATG   | GAATAGACACACCACGTTTCATG  |
| MVK           | CTGAAGTCAATCAACAAGTGGG   | CTCTCAAGGAAGACATCGTCC    |
| MVD           | GACAAGAAGCAGACGGGCAGTAC  | CGCTCAGGCACAACAGACTCAG   |
| ID11          | ATTGAAGTACAGCTCTCCGCACAG | CACATCTCCGCTAGAAGCTGAACC |
| FDPS          | GGATGCCATCAACGACGCTCTG   | CTCCAGCAGGTTCAAGTAGTAGGG |
| FDFT1         | GCAAGGAGAAGGACCGACAA     | GTCCCAGTCCTGTTTGGAGG     |
| FASN          | CAAGTGCAAACCAGACTTCTAC   | GCACTTTCTTTTCCGGTACTTT   |
| ACC           | GGCCAGTGATATGCTGAGAT     | AGGGTCAAGTGCTGCTCCA      |
| CD36          | CTTTGAAAGAACTCTTGTTGGGG  | GTCTGTGCCATTAATCATGTGCG  |
| SCD1          | AACATTCAATCCCGGGAGAATA   | GAAACTTTCTTCCGGTCGTAAG   |
| SREBP-1C      | GCTACCGGTCTTCTATCAATGA   | CGCAAGACAGCAGATTTATTCA   |
| PPARA         | GAGCTGCAAGATTCAGAAGAAG   | GAATCTTTCAGGTCGTGTTTAC   |
| PPAR $\gamma$ | CCAAGAATACCAAAGTGCGATC   | TCACAAGCATGAACTCCATAGT   |
| CLOCK         | GGCTGAAAGACGGCGAGAACTT   | GTGCTTCCTTGAGACTCACTGTG  |
| BMAL1         | ACCTCGCAGAATGTCACAGGCA   | CTGAACCATCGACTTCGTAGCG   |
| PER1          | GAAACCTCTGGCTGTTCTTACC   | AGGCTGAAGAGGCAGTGTAGGA   |
| PER2          | CTGCTTGTTCCAGGCTGTGGAT   | CTTCTTGTTGGATGGCGAGCATC  |
| CRY1          | GGTTGCCTGTTTCTGACTCGT    | GACAGCCACATCCAACCTCCAG   |
| CRY2          | GGACAAGCACTTGGAAACGGAAG  | ACAAGTCCCACAGGCGGTAGTA   |
| NR1D1         | CAGGCTTCCGTGACCTTTCTCA   | TAGGTTGTGCGGCTCAGGAACA   |
| BHLHE41       | GGCATTGGAGAAAGCAGTAGTC   | AGTGGAACGCATCCAAGTCGGC   |
| CPT1A         | GGCATAAACGCAGAGCATTCTCTG | CAGTGTCCATCCTCTGAGTAGC   |
| CRAT          | AGAGCCTGTTGGCATCCTAACC   | TTGTCCAGGCACACGGTGAAGA   |
| GPAM          | GCAAGCACTGTTACCAGCGATC   | TGCAATCAGCCTTCGTCGGAAG   |
| ACLY          | AGGAAGTGCCACCTCCAACAGT   | CGCTCATCACAGATGCTGGTCA   |
| ACSL5         | GCATCATTCGGCGGGACAGTTT   | GTCAAGACTGGAGTGGAGATGG   |
| ABCG8         | GGTCCTTCTGATGACATCTGGC   | CGTCTGTCGATGCTGGTCAAGT   |
| CYP27A1       | TCAGGAGACCATCGGCACCTTT   | CCAGTCACTTCTTGTGCAAGG    |
| APOA2         | CGGATATGCAGAGCCTGTTTAC   | CTCGTGTGTCTTCTCAAAGTATGC |
| HNF1A         | AGAGACCTTGGTGGAGGAGTGT   | GGCAAACCAGTTGTAGACACGC   |
| FADS2         | TTCCTGGAGAGCCACTGGTTTG   | GAAGAAGGACTGCTCCACATTGC  |

|      |                        |                         |
|------|------------------------|-------------------------|
| ESR1 | TCTGCCAAGGAGACTCGCTACT | GGTGCATTGGTTTGTAGCTGGAC |
| ESR2 | GGTCCTGTGAAGGATGTAAGGC | TAACACTTGCGAAGTCGGCAGG  |

SREBP2, sterol regulatory element-binding protein 2; HMGCR, 3-hydroxy-3-methylglutaryl-coenzyme A reductase; MVK, mevalonate kinase; MVD, diphosphomevalonate decarboxylase; FDFT1, farnesyl-diphosphate farnesyltransferase 1; IDI1, isopentenyl-diphosphate  $\Delta$  isomerase 1; FDPS, farnesyl diphosphate synthase; LSS, lanosterol synthase; PPAR, peroxisome proliferator-activated receptor; SCD1, stearoyl-CoA desaturase 1; FASN, fatty acid synthase; ACC, acetyl CoA carboxylase; CLOCK, clock circadian regulator; BMAL1, brain and muscle arnt-like protein 1; PER1, period circadian regulator 1; CRY1, cryptochrome circadian regulator 1; NR1D1, nuclear receptor subfamily 1 group D member 1; BHLHE41, basic helix-loop-helix family member e41; ESR, estrogen receptor; CRAT, carnitine O-acetyltransferase; FADS, fatty acid desaturase; HNF1A, HNF1 homeobox A; ACSL5, acyl-CoA synthetase long chain family member 5; ACLY, ATP citrate lyase; CPT1A, carnitine palmitoyltransferase 1A; APOA2, apolipoprotein A-II; ABCG8, ATP binding cassette subfamily G member 8; CYP27A1, family 27, subfamily a, polypeptide 1; GPAM, glycerol-3-phosphate acyltransferase, mitochondrial.

Table SII. Antibodies used for western blotting.

| Antibody       | Cat. no.  | Supplier       | Dilution |
|----------------|-----------|----------------|----------|
| GAPDH          | 2118      | CST            | 1:1,000  |
| IDII           | ab97448   | Abcam          | 1:1,000  |
| MVD            | ab96226   | Abcam          | 1:1,000  |
| HMGCR          | ab174830  | Abcam          | 1:1,000  |
| MVK            | ab154515  | Abcam          | 1:1,000  |
| LSS            | ab80364   | Abcam          | 1:1,000  |
| FASN           | 3180      | CST            | 1:1,000  |
| ACC            | ab45174   | Abcam          | 1:1,000  |
| CLOCK          | ET1704-82 | HUABIO         | 1:1,000  |
| BMAL1          | ET1705-5  | HUABIO         | 1:1,000  |
| p-mTOR         | 2971      | CST            | 1:1,000  |
| mTOR           | 2972      | CST            | 1:1,000  |
| p-IRS1Tyr608   | 09-432    | MilliporeSigma | 1:1,000  |
| IRS1           | 2382      | CST            | 1:1,000  |
| p-GYSSer641    | 3891      | CST            | 1:1,000  |
| GYS            | 3886      | CST            | 1:1,000  |
| H3             | 4499      | CST            | 1:1,000  |
| $\beta$ -actin | 8227      | Abcam          | 1:1,000  |

HMGCR, 3-hydroxy-3-methylglutaryl-coenzyme A reductase; MVK, mevalonate kinase; MVD, diphosphomevalonate decarboxylase; FDFT1, farnesyl-diphosphate farnesyltransferase 1; IDII, isopentenyl-diphosphate delta isomerase 1; LSS, lanosterol synthase; FASN, fatty acid synthase; ACC, acetyl CoA carboxylase; CLOCK, clock circadian regulator; BMAL1, brain and muscle arnt-like protein 1; p-, phosphorylated; IRS1, insulin receptor substrate 1; GS, glycogen synthase; H3, histone 3.
